# Supplementary material for: Morpho-Physiological Traits and Functional Markers Based Molecular Dissection of Heat-Tolerance in Urdbean
Source: Front Plant Sci. 2021 Sep 29;12:719381. doi: 10.3389/fpls.2021.719381 (PMC8511409; doi:10.3389/fpls.2021.719381)
Supplement: Supplementary file 1 [file Table_1.xlsx]

## Sheet: Sheet1
Supplementary Table S1. Details of 97 tested urdbean plant materials.
Sl. No.	Accession/Cultivar name	IC Number	Type of material	Pedigree/Parentage	Source
1	IPU 91-7	IC471989	Germplasm	Collection from Kerala, India	IIPR, Kanpur
2	IPU 94-2	IC519905	Germplasm	Collection from Kanpur, India	IIPR, Kanpur
3	IPU 95-13	IC519906	Germplasm	Collection from Kanpur, India	IIPR, Kanpur
4	Pant U-30	NA	Germplasm	Collection from Pantnagar, India	GBPUA&T, Pantnagar
5	LBG 20	IC393562	Germplasm	Collection from Lam, India	ANGRU, Lam
6	UPU 97-100	IC530506	Germplasm	Collection from Kanpur, India	IIPR, Kanpur
7	NO 7668-4B	NA	Germplasm	Collection from Kanpur, India	IIPR, Kanpur
8	PGRU 95018	NA	Germplasm	Collection from Kanpur, India	IIPR, Kanpur
9	PGRU 95014	NA	Germplasm	Collection from Kanpur, India	IIPR, Kanpur
10	PGRU 95016	NA	Germplasm	Collection from Kanpur, India	IIPR, Kanpur
11	TU 99-293	NA	Germplasm	Unknown	BARC, Mumbai
12	Pant U-19S	NA	Breeding line	Selection from Pant urd 19	IIPR, Kanpur
13	TU 99-2	NA	Germplasm	Unknown	BARC, Mumbai
14	TU 91-22	NA	Germplasm	Unknown	BARC, Mumbai
15	PLU-28	NA	Germplasm	Unknown	NBPGR, New Delhi
16	PLU-1	NA	Germplasm	Unknown	NBPGR, New Delhi
17	UH -177	IC530492	Germplasm	Collection from Kanpur, India	IIPR, Kanpur
18	BG-369	NA	Germplasm	Unknown	IIPR, Kanpur
19	BGP 21-28	NA	Germplasm	Unknown	IIPR, Kanpur
20	U-9	IC530641	Germplasm	Collection from Kanpur, India	IIPR, Kanpur
21	IC 106088	IC 106088	Germplasm	Unknown	IIPR, Kanpur
22	UH 32-3	IC530473	Germplasm	Collection from Kanpur, India	IIPR, Kanpur
23	STY 2868	IC530502	Germplasm	Collection from Kanpur, India	IIPR, Kanpur
24	UH 85-15	IC530484	Germplasm	Collection from Kanpur, India	IIPR, Kanpur
25	IPU 90-32	NA	Germplasm	Collection from Kanpur, India	IIPR, Kanpur
26	IPU 90-321	NA	Germplasm	Collection from Kanpur, India	IIPR, Kanpur
27	IPU 99-79	NA	Germplasm	Collection from Kanpur, India	IIPR, Kanpur
28	PLU-8	NA	Germplasm	Collection from Kanpur, India	IIPR, Kanpur
29	IPU 99-123	IC519922	Germplasm	Collection from Kanpur, India	IIPR, Kanpur
30	UH 80-26	NA	Germplasm	Collection from Kanpur, India	IIPR, Kanpur
31	IPU 99-23	IC393545	Germplasm	Collection from Rampur, Uttar Pradesh.	IIPR, Kanpur
32	IC -21001	NA	Germplasm	Unknown	IIPR, Kanpur
33	IPU 99-95	IC519921	Germplasm	Collection from Kanpur, India	IIPR, Kanpur
34	IPU 99-40	IC393546	Germplasm	Collection from Kanpur Dehat, Uttar Pradesh.	IIPR, Kanpur
35	PKGU-1	NA	Germplasm	Collection from Kanpur, India	IIPR, Kanpur
36	IPU 99-89	IC519920	Germplasm	Collection from Kanpur, India	IIPR, Kanpur
37	NG-2119	NA	Germplasm	Collection from Kanpur, India	IIPR, Kanpur
38	NO- 5731	NA	Germplasm	Collection from Kanpur, India	IIPR, Kanpur
39	Mash 1-1	NA	Germplasm	Unknown	PAU, Ludhiana
40	UG-414	IC296078	Germplasm	Unknown	PAU, Ludhiana
41	IPU 96-6	IC519908	Germplasm	Unknown	IIPR, Kanpur
42	IPU 98/36	NA	Germplasm	Unknown	IIPR, Kanpur
43	U-3108	IC530639	Germplasm	Unknown	IIPR, Kanpur
44	DUS 34	NA	Germplasm	Collection from Kanpur	IIPR, Kanpur
45	STY 2289	NA	Germplasm	Unknown	IIPR, Kanpur
46	IC-65511	NA	Germplasm	Unknown	IIPR, Kanpur
47	UH 99-144	NA	Germplasm	Unknown	IIPR, Kanpur
48	UH 86-5	NA	Germplasm	Unknown	IIPR, Kanpur
49	STY-2834	NA	Germplasm	Unknown	IIPR, Kanpur
50	PLU-429	NA	Germplasm	Collection from Delhi	IIPR, Kanpur
51	PLU-144	NA	Germplasm	Collection from Delhi	IIPR, Kanpur
52	UPU 85-86	NA	Germplasm	Collection from Kanpur	IIPR, Kanpur
53	STY 2115	IC530500	Germplasm	Collection from Kanpur	IIPR, Kanpur
54	IPU 99-31	IC519912	Germplasm	Collection from Kanpur	IIPR, Kanpur
55	U-132	NA	Germplasm	Collection from Kanpur	IIPR, Kanpur
56	N0 7368-15	IC530647	Germplasm	Collection from Kanpur	IIPR, Kanpur
57	UH 80-38	NA	Germplasm	Collection from Kanpur	IIPR, Kanpur
58	PLU-65	IC530448	Germplasm	Collection from Kanpur	IIPR, Kanpur
59	BGP-247	IC471979	Germplasm	Collection from Kerala	IIPR, Kanpur
60	PLU -456	IC530454	Germplasm	Collection from Kanpur	IIPR, Kanpur
61	UG -218	IC296076	Germplasm	Collection from Punjab	PAU, Ludhiana
62	PDU-3	IC530657	Germplasm	Collection from Kanpur	IIPR, Kanpur
63	PLU -328	NA	Germplasm	Collection from Kanpur	IIPR, Kanpur
64	NHKD-31	NA	Germplasm	Collection from Kanpur	IIPR, Kanpur
65	STY-2824	IC530502	Germplasm	Collection from Kanpur	IIPR, Kanpur
66	IPU 96-1	NA	Germplasm	Collection from Kanpur	IIPR, Kanpur
67	IPU2K-21	NA	Germplasm	Collection from Kanpur	IIPR, Kanpur
68	IPU-722	NA	Germplasm	Collection from Kanpur	IIPR, Kanpur
69	IC-10703	IC-10703	Germplasm	Collection from Shimla	IIPR, Kanpur
70	IPU 96-12	IC519909	Germplasm	Collection from Kanpur	IIPR, Kanpur
71	IPU 99-22	IC519911	Germplasm	Collection from Kanpur	IIPR, Kanpur
72	PLU-703	IC485458	Germplasm	Collection from Delhi	NBPGR, New Delhi
73	PLU-557	NA	Germplasm	Collection from Delhi	IIPR, Kanpur
74	UG-378	IC530606_1	Germplasm	Collection from Kanpur	IIPR, Kanpur
75	IPU 99-128	NA	Germplasm	Collection from Kanpur	IIPR, Kanpur
76	H-1	IC393593	Germplasm	Collection from Haryana	NBPGR, New Delhi
77	IPU 99-40	IC519914	Germplasm	Collection from Kanpur	IIPR, Kanpur
78	UPU 83-3	NA	Germplasm	Collection from Kanpur	IIPR, Kanpur
79	PLU-662	NA	Germplasm	Collection from Delhi	IIPR, Kanpur
80	UH 87-7	NA	Germplasm	Unknown	IIPR, Kanpur
81	UH 84-4	IC530482	Germplasm	Collection from Kanpur	IIPR, Kanpur
82	IPU 99-43	IC519914	Germplasm	Collection from Kanpur	IIPR, Kanpur
83	PDU-1		Cultivar	Selection from PLU 91	IIPR, Kanpur
84	IPU 99-18	NA	Germplasm	Collection from Kanpur	IIPR, Kanpur
85	IPU 99-16	NA	Germplasm	Collection from Kanpur	IIPR, Kanpur
86	IPU 99-200	NA	Germplasm	Collection from Kanpur	IIPR, Kanpur
87	UH 85-3	IC530483	Germplasm	Collection from Kanpur	IIPR, Kanpur
88	HPU-120	IC530507	Germplasm	Collection from Kanpur	IIPR, Kanpur
89	JU 78-27	NA	Germplasm	Unknown	IIPR, Kanpur
90	PU-19	NA	Cultivar	UP 1 x UP 2	GBPUA&T, Pantnagar
91	IPU 99-209	NA	Germplasm	Collection from Kanpur	IIPR, Kanpur
92	IPU 99-232	IC472003	Germplasm	Collection from Kerala	IIPR, Kanpur
93	IPU 99-221	NA	Germplasm	Collection from Kanpur	IIPR, Kanpur
94	IPU 99-179	NA	Germplasm	Collection from Kanpur	IIPR, Kanpur
95	Uttara	NA	Cultivar	NPI 9 x T 9	IIPR, Kanpur
96	Shekhar-2	NA	Cultivar	T9 x 7378/2	CSAUA&T, Kanpur
97	IPU 02-43	NA	Cultivar	DPU 88-31 x DUR-1	IIPR, Kanpur
